# Supplementary material for: Acute effects of cannabigerol on anxiety, stress, and mood: a double-blind, placebo-controlled, crossover, field trial
Source: PubMed Central journal article supplement (PMC11246434; doi:10.1038/s41598-024-66879-0), 2024-07-13
Supplement: 41598_2024_66879_MOESM1_ESM.pdf [file 41598_2024_66879_MOESM1_ESM.pdf]

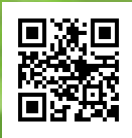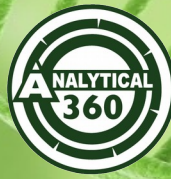

**Certificate of Analysis**  
**CBG Cultivar**

Test Result UID: ANL0014562  
 Washington State Lot Inventory ID:  
 Washington State Lab Inventory ID:  
 Date Tested: 09/12/2018  
 Serving Size: =

**Photographs**

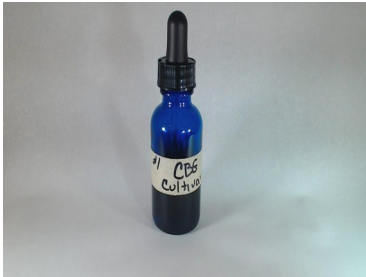

**Summary**

|                 |                        |                        |
|-----------------|------------------------|------------------------|
| Cannabinoids:   | THC Total: < 0.01 mg/g | CBD Total: < 0.01 mg/g |
|                 | --                     | --                     |
| Terpene Total:  | Not Tested             |                        |
|                 | Not Tested             |                        |
| Microbial:      | Not Tested             |                        |
| Pesticides:     | Not Tested             |                        |
| Heavy Metals:   | Not Tested             |                        |
| Water Activity: | Not Tested             |                        |

**Mycotoxins** (Method: ELISA)

|                     |            |            |            |
|---------------------|------------|------------|------------|
| Aflatoxins Total:   | Not Tested | Not Tested | Not Tested |
| Ochratoxin A Total: | Not Tested | Not Tested |            |



**Certificate of Analysis**  
**CBG Cultivar**

Test Result UID: ANL0014562  
 Washington State Lot Inventory ID:  
 Washington State Lab Inventory ID:  
 Date Tested: 09/12/2018  
 Serving Size: =

**Potency Profile** (Method: HPLC-DAD)

|                                                                                            |             |    |
|--------------------------------------------------------------------------------------------|-------------|----|
| CBG-A                                                                                      | 0.89 mg/g   | -- |
| CBG                                                                                        | 10.04 mg/g  | -- |
| <b>CBG TOTAL</b>                                                                           | 10.82 mg/g  | -- |
| <small>(CBG-A * 0.878 + CBG)<sup>1</sup></small>                                           |             |    |
| Δ9-THC-A                                                                                   | < 0.01 mg/g | -- |
| Δ9-THC                                                                                     | < 0.01 mg/g | -- |
| Δ9-THCV                                                                                    | < 0.01 mg/g | -- |
| Δ8-THC                                                                                     | < 0.01 mg/g | -- |
| CBN                                                                                        | < 0.01 mg/g | -- |
| <b>THC-TOTAL</b>                                                                           | < 0.01 mg/g | -- |
| <small>(THC-A * 0.877 + THC)<sup>1</sup></small>                                           |             |    |
| CBD-A                                                                                      | < 0.01 mg/g | -- |
| CBD                                                                                        | < 0.01 mg/g | -- |
| CBDV-A                                                                                     | < 0.01 mg/g | -- |
| CBDV                                                                                       | < 0.01 mg/g | -- |
| <b>CBD-TOTAL</b>                                                                           | < 0.01 mg/g | -- |
| <small>(CBD-A * 0.877 + CBD)<sup>1</sup></small>                                           |             |    |
| CBC                                                                                        | < 0.01 mg/g | -- |
| <b>ACTIVATED-TOTAL</b>                                                                     | 10.04 mg/g  | -- |
| <small>(Δ9THC + 9-THCV + Δ8THC + CBN + CBD + CBDV + CBG + CBC)<sup>2</sup></small>         |             |    |
| <b>TOTAL DETECTED CANNABINOIDS</b>                                                         | 10.82 mg/g  | -- |
| <small>(CBDV TOTAL + THC TOTAL + CBD TOTAL + CBG TOTAL + D8THC + CBN + CBC + THCv)</small> |             |    |

1 - Cannabinoid totals are adjusted to account for the decarboxylation of the cannabinoid acids. The reported total is the amount of the activated cannabinoid that would be if all of the carboxylic acid has been removed through decarboxylation.

2 - Cannabinoids that have been activated through decarboxylation (curing/storage of flowers, or heating/cooking of edibles, tinctures, & concentrates)



## Certificate of Analysis CBG Cultivar

Page 3 of 3: Summary & Inspection  
LeBlanc CNE

Test Result UID: ANL0014562  
Washington State Lot Inventory ID:  
Washington State Lab Inventory ID:  
Date Tested: 09/12/2018  
Serving Size: =

Analytical 360, LLC certifies that the results presented on the previous 3 pages are true and correct to the best of our knowledge. These results relate only to the sample provided by the client to Analytical 360, LLC.

Approved by: Paul D. Matthews, Ph.D.  
Lab Director/Chief Science Officer

UBI: 603120434  
Lab: 0004

### Reference Lab:

Analytical 360 subcontracts the following assays:

Mycotoxins and Water Activity performed by Capitol Analysis (Lab #0022)

### Labtech Notes

- None
