# Supplementary material for: Acute effects of cannabigerol on anxiety, stress, and mood: a double-blind, placebo-controlled, crossover, field trial
Source: PubMed Central journal article supplement (PMC11246434; doi:10.1038/s41598-024-66879-0), 2024-07-13
Supplement: 41598_2024_66879_MOESM2_ESM.pdf [file 41598_2024_66879_MOESM2_ESM.pdf]

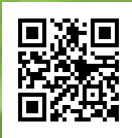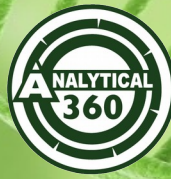

**Certificate of Analysis**  
**CBG Trial**

Page 1 of 3: Summary & Inspection  
 LeBlanc CNE

Test Result UID: ANL0016149  
 Washington State Lot Inventory ID:  
 Washington State Lab Inventory ID:  
 Date Tested: 10/26/2018

**Photographs**

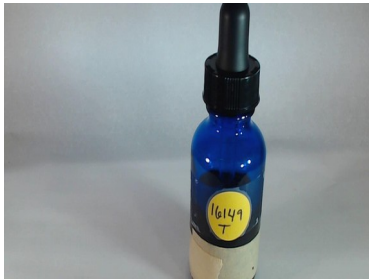

**Summary**

|               |                 |            |                |            |
|---------------|-----------------|------------|----------------|------------|
| Cannabinoids: | THC Total:      | Not Tested | CBD Total:     | Not Tested |
|               | Terpene Total:  | 0.05 %     | Solvent Total: | Not Tested |
|               | Microbial:      | Not Tested | Pesticides:    | Not Tested |
|               | Heavy Metals:   | Not Tested |                |            |
|               | Water Activity: | Not Tested | Not Tested     |            |

**Mycotoxins** (Method: ELISA)

|                     |            |            |            |
|---------------------|------------|------------|------------|
| Aflatoxins Total:   | Not Tested | Not Tested | Not Tested |
| Ochratoxin A Total: | Not Tested | Not Tested | Not Tested |



## Certificate of Analysis CBG Trial

Page 2 of 3: Terpenes  
LeBlanc CNE

Test Result UID: ANL0016149  
Washington State Lot Inventory ID:  
Washington State Lab Inventory ID:  
Date Tested: 10/26/2018

### Terpene Profile (Method: HS-GC-FID)

|                      |                  |               |
|----------------------|------------------|---------------|
| Alpha Pinene         | < 0.01 mg/g      | < 0.01 %      |
| Beta Pinene          | < 0.01 mg/g      | < 0.01 %      |
| Myrcene              | < 0.01 mg/g      | < 0.01 %      |
| Ocimene              | < 0.01 mg/g      | < 0.01 %      |
| Limonene             | < 0.01 mg/g      | < 0.01 %      |
| Terpinolene          | < 0.01 mg/g      | < 0.01 %      |
| Linalool             | < 0.01 mg/g      | < 0.01 %      |
| Caryophyllene        | 0.35 mg/g        | 0.03 %        |
| Humulene             | 0.16 mg/g        | 0.02 %        |
| <b>Terpene Total</b> | <b>0.51 mg/g</b> | <b>0.05 %</b> |



Tested By

**ANALYTICAL 360**

Cannabis Analysis Laboratory

## Certificate of Analysis CBG Trial

Page 3 of 3: Certification  
LeBlanc CNE

Test Result UID: ANL0016149  
Washington State Lot Inventory ID:  
Washington State Lab Inventory ID:  
Date Tested: 10/26/2018

Analytical 360, LLC certifies that the results presented on the previous 3 pages are true and correct to the best of our knowledge. These results relate only to the sample provided by the client to Analytical 360, LLC.

Approved by: Paul D. Matthews, Ph.D.  
Lab Director/Chief Science Officer

UBI: 603120434  
Lab: 0004

### Reference Lab:

Analytical 360 subcontracts the following assays:

Mycotoxins and Water Activity performed by Capitol Analysis (Lab #0022)

### Labtech Notes

- None
